# Supplementary material
Source: MDPI journal article supplement (https://www.mdpi.com/2071-1050/11/6/1806)
Supplement: s1 [file s1]

# Supporting Information

Uncovering variations, determinants and disparities of multi-sector level final energy use of industry across cities

**Table 1.** Value added of three industries of ten Chinese cities in 2015 (Unit: Billion Chinese Yuan).

|                    | Beijing | Tianjin | Hangzhou | Shenyang | Xi'an  | Fuzhou | Guiyang |
|--------------------|---------|---------|----------|----------|--------|--------|---------|
| Primary Industry   | 14.04   | 20.88   | 28.79    | 34.14    | 22.02  | 43.47  | 12.89   |
| Secondary Industry | 466.06  | 791.81  | 390.90   | 347.42   | 212.63 | 244.96 | 110.85  |
| Industry           | 383.07  | 719.65  | 349.78   | 308.88   | 137.67 | 187.53 | 71.41   |
| Construction       | 96.19   | 74.03   | 41.12    | 38.54    | 74.96  | 58.04  | 39.44   |
| Tertiary Industry  | 1888.47 | 871.09  | 585.32   | 345.67   | 345.47 | 273.38 | 165.28  |

**Table 2.** Aggregation of industrial sectors.

| Code | Aggregate sectors                                       | Code | Industrial sectors                                                                       |
|------|---------------------------------------------------------|------|------------------------------------------------------------------------------------------|
| IS1  | Mining of coal                                          | 1    | Mining and Washing of Coal                                                               |
| IS2  | Extraction of oil & natural gas                         | 2    | Extraction of Petroleum and Natural Gas                                                  |
| IS3  | Mining & processing of ores                             | 3    | Mining and Processing of Ferrous Metal Ores                                              |
|      |                                                         | 4    | Mining and Processing of Non-Ferrous Metal Ores                                          |
|      |                                                         | 5    | Mining and Processing of Non-metal Ores                                                  |
|      |                                                         | 6    | Support Activities for Mining                                                            |
|      |                                                         | 7    | Mining of Other Ores                                                                     |
|      |                                                         | 8    | Processing of Food from Agricultural Products                                            |
|      |                                                         | 9    | Manufacture of Foods                                                                     |
| IS4  | Light industry                                          | 10   | Manufacture of Liquor, Beverages and Refined Tea                                         |
|      |                                                         | 11   | Manufacture of Tobacco                                                                   |
|      |                                                         | 12   | Manufacture of Textile                                                                   |
|      |                                                         | 13   | Manufacture of Textile, Wearing Apparel and Accessories                                  |
|      |                                                         | 14   | Manufacture of Leather, Fur, Feather and Related Products and Footwear                   |
|      |                                                         | 15   | Processing of Timber, Manufacture of Wood, Bamboo, Rattan, Palm and Straw Products       |
|      |                                                         | 16   | Manufacture of Furniture                                                                 |
|      |                                                         | 17   | Manufacture of Paper and Paper Products                                                  |
|      |                                                         | 18   | Printing and Reproduction of Recording Media                                             |
|      |                                                         | 19   | Manufacture of Articles for Culture, Education, Crafts, Sport and Entertainment products |
| IS5  | Petroleum processing & coking                           | 20   | Processing of Petroleum, Coking and Processing of Nuclear Fuel                           |
| IS6  | Chemicals                                               | 21   | Manufacture of Raw Chemical Materials and Chemical Products                              |
|      |                                                         | 22   | Manufacture of Medicines                                                                 |
|      |                                                         | 23   | Manufacture of Chemical Fibers                                                           |
| IS7  | Non-metals                                              | 24   | Manufacture of Rubber and Plastics Products                                              |
| IS8  | Metals                                                  | 25   | Manufacture of Non-metallic Mineral Products                                             |
|      |                                                         | 26   | Smelting and Pressing of Ferrous Metals                                                  |
|      |                                                         | 27   | Smelting and Pressing of Non-ferrous Metals                                              |
|      |                                                         | 28   | Manufacture of Metal Products                                                            |
| IS9  | Manufacture of equipment                                | 29   | Manufacture of General Purpose Machinery                                                 |
|      |                                                         | 30   | Manufacture of Special Purpose Machinery                                                 |
|      |                                                         | 31   | Manufacture of Automobiles                                                               |
|      |                                                         | 32   | Manufacture of Railway, Ship, Aerospace and Other Transport Equipment                    |
|      |                                                         | 33   | Manufacture of Electrical Machinery and Apparatus                                        |
|      |                                                         | 34   | Manufacture of Computers, Communication and Other Electronic Equipment                   |
|      |                                                         | 35   | Manufacture of Measuring Instruments and Machinery                                       |
|      |                                                         | 36   | Other Manufacture                                                                        |
|      |                                                         | 37   | Utilization of Waste Resources                                                           |
|      |                                                         | 38   | Repair Service of Metal Products, Machinery and Equipment                                |
| IS10 | Production and supply of electricity, heat, gas & water | 39   | Production and Supply of Electricity and Heat                                            |
|      |                                                         | 40   | Production and Supply of Gas                                                             |
|      |                                                         | 41   | Production and Supply of Water                                                           |

**Table 3.** References for data sources in this study.

| References (in Chinese) |                                                                                                                                              |
|-------------------------|----------------------------------------------------------------------------------------------------------------------------------------------|
| 1                       | Fujian Statistical Bureau. <i>Fujian Statistical Year Book 2006-2016</i> ; China Statistics Press: Beijing, China, 2006-2016.                |
| 2                       | Guizhou Statistical Bureau. <i>Guizhou Statistical Year Book 2006-2016</i> ; China Statistics Press: Beijing, China, 2006-2016.              |
| 3                       | Statistics Bureau of Zhejiang Province. <i>Zhejiang Statistical Year Book 2006-2016</i> ; China Statistics Press: Beijing, China, 2006-2016. |
| 4                       | Liaoning Statistical Bureau. <i>Liaoning Statistical Year Book 2006-2016</i> ; China Statistics Press: Beijing, China, 2006-2016.            |
| 5                       | Shaanxi Statistical Bureau. <i>Shaanxi Statistical Year Book 2006-2016</i> ; China Statistics Press: Beijing, China, 2006-2016.              |
| 6                       | Beijing Statistical Bureau. <i>Beijing Statistical Year Book 2006-2016</i> ; China Statistics Press: Beijing, China, 2006-2016.              |
| 7                       | Fuzhou Statistical Bureau. <i>Fuzhou Statistical Year Book 2006-2016</i> ; China Statistics Press: Beijing, China, 2006-2016.                |
| 8                       | Guiyang Statistical Bureau. <i>Guiyang Statistical Year Book 2006-2016</i> ; China Statistics Press: Beijing, China, 2006-2016.              |
| 9                       | Hangzhou Statistical Bureau. <i>Hangzhou Statistical Year Book 2006-2016</i> ; China Statistics Press: Beijing, China, 2006-2016.            |
| 10                      | Shenyang Statistical Bureau. <i>Shenyang Statistical Year Book 2006-2016</i> ; China Statistics Press: Beijing, China, 2006-2016.            |
| 11                      | Tianjin Statistical Bureau. <i>Tianjin Statistical Year Book 2006-2016</i> ; China Statistics Press: Beijing, China, 2006-2016.              |
| 12                      | Xi'an Statistical Bureau. <i>Xi'an Statistical Year Book 2006-2016</i> ; China Statistics Press: Beijing, China, 2006-2016.                  |
| 13                      | National Bureau of Statistics of China. <i>China Energy Statistical Yearbook 2016</i> . China Statistics Press: Beijing, China, 2006-2016.   |

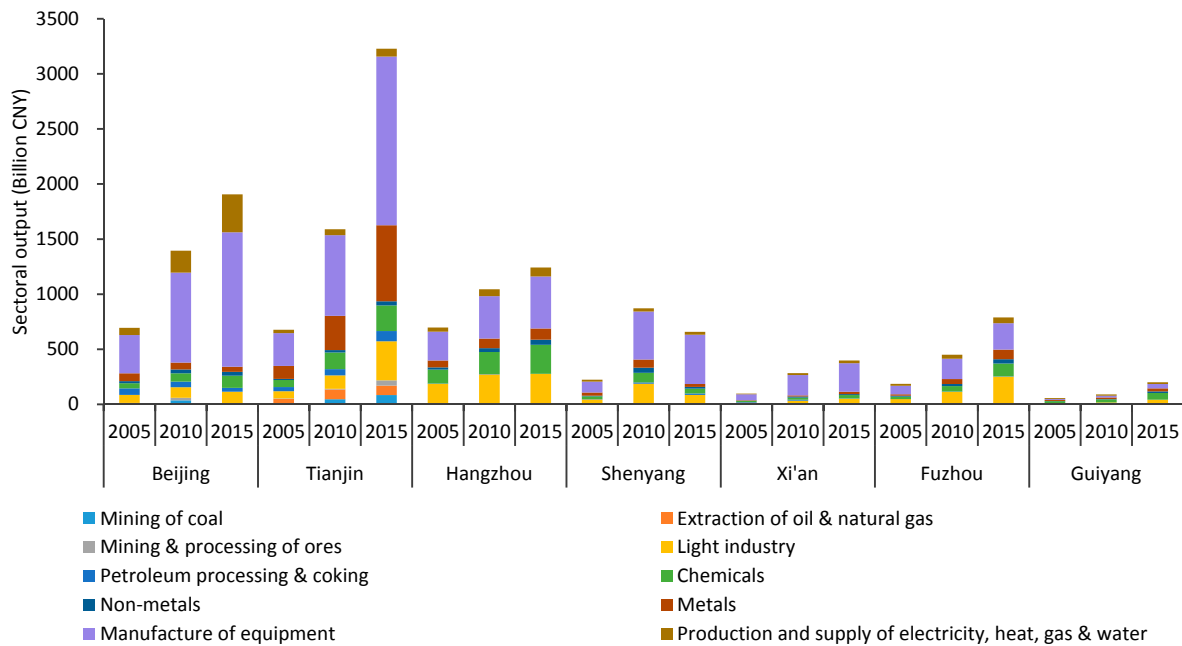

**Figure 1.** Industrial sectoral output in 7 cities in 2005, 2010 and 2015. (CNY, Chinese Yuan).

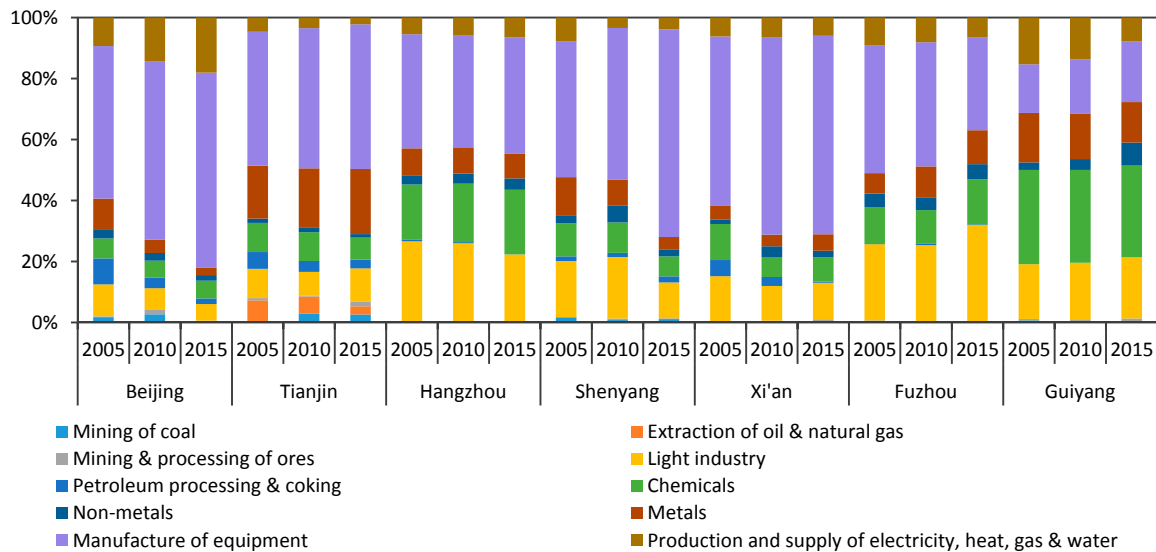

**Figure S2.** Changes in proportion of sectoral output in 7 cities during 2005-2015.

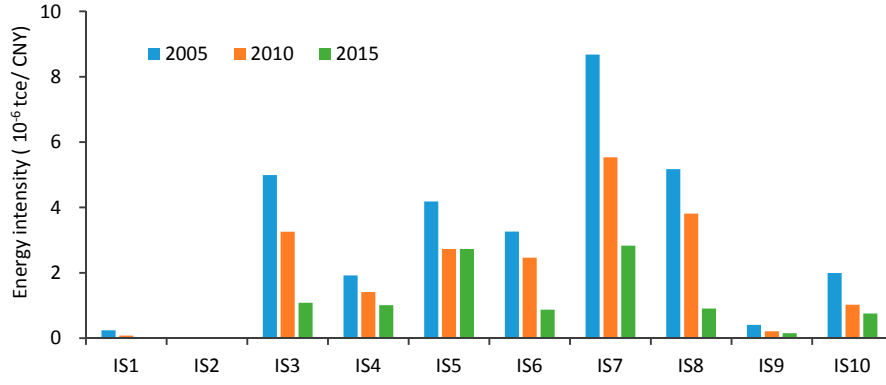

**Figure S3.** Changes in energy intensity of industrial sectors in Beijing.

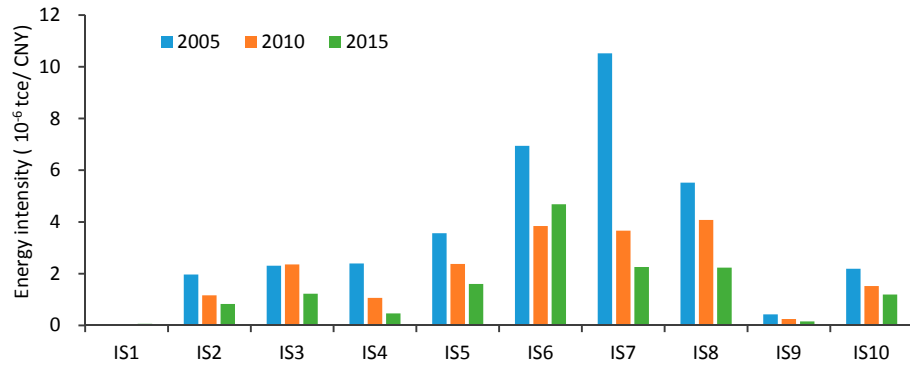

**Figure S4.** Changes in energy intensity of industrial sectors in Tianjin.

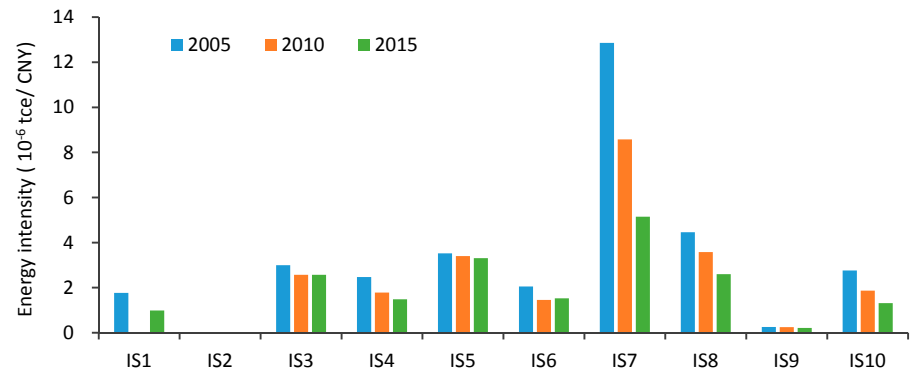

**Figure S5.** Changes in energy intensity of industrial sectors in Hangzhou.

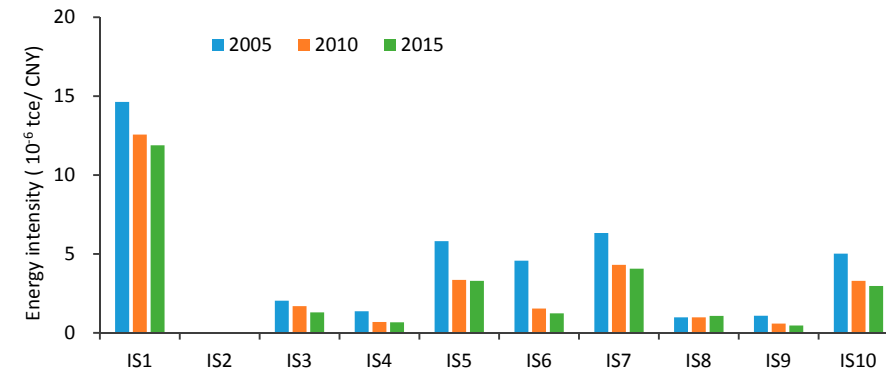

**Figure S6.** Changes in energy intensity of industrial sectors in Shenyang.

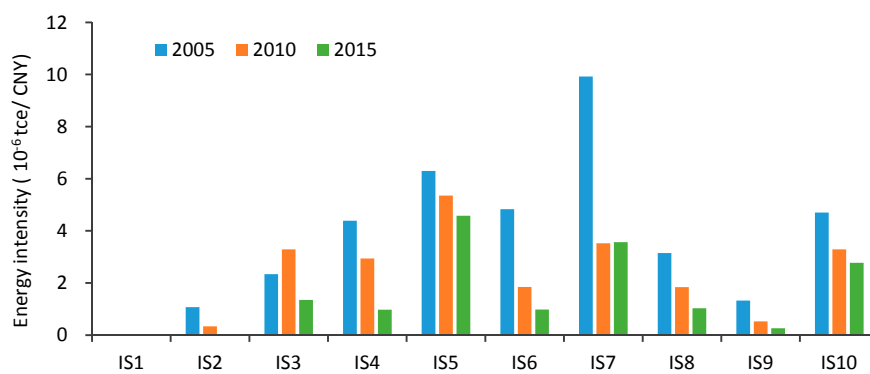

**Figure S7.** Changes in energy intensity of industrial sectors in Xi'an.

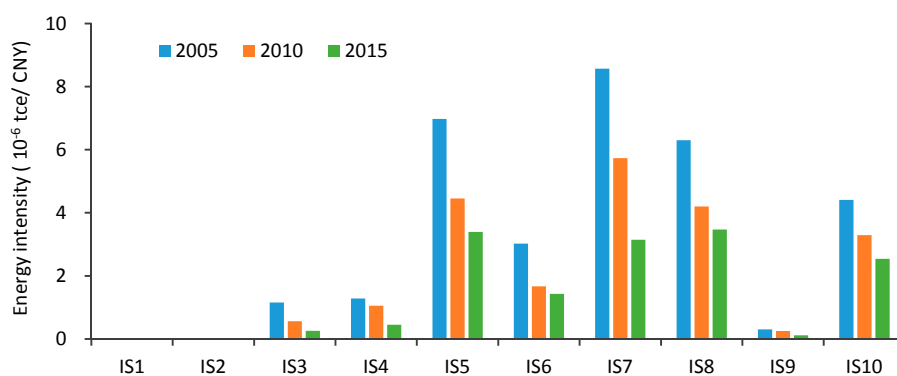

**Figure S8.** Changes in energy intensity of industrial sectors in Fuzhou.

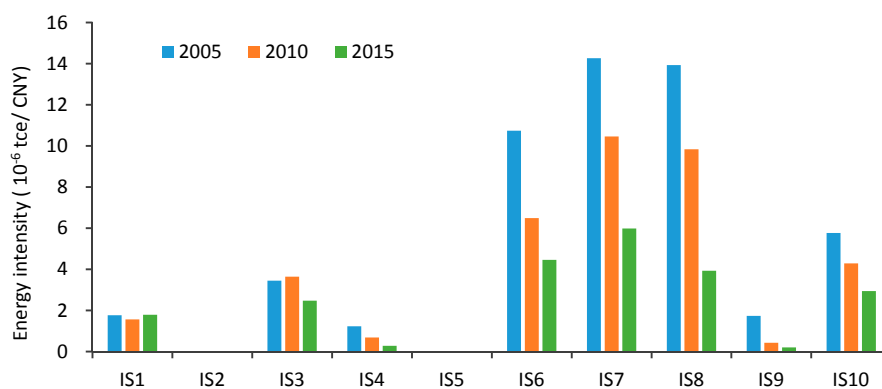

**Figure S9.** Changes in energy intensity of industrial sectors in Guiyang.
